# Supplementary material for: Fusion of perylene bisimides and hexaazatriphenylene into a star-shaped ladder conjugated n-type semiconductor
Source: Royal Society of Chemistry journal article supplement (doi:10.1039/c3ra44553d), 2013-01-01

Supplementary information

**Fusion of Perylene Bisimides and Hexaazatriphenylene  
into Star-Shaped Ladder Conjugated N-Type  
Semiconductor**

Zhenbo Zhao,<sup>†</sup> Yi Xiao,<sup>\*,†</sup> Youdi Zhang,<sup>†</sup> and Helin Wang<sup>†</sup>

<sup>†</sup>State Key Laboratory of Fine Chemicals, Dalian University of Technology, Dalian  
116012, China

E-mail: xiaoyi @ dlut.edu.cn

**Contents**

|                                                                              |    |
|------------------------------------------------------------------------------|----|
| 1 Material and methods .....                                                 | S2 |
| 2 Synthesis of target compound.....                                          | S3 |
| 3 Differential pulse voltammetry (DPV) of <b>TriPBI</b> and <b>PBI</b> ..... | S4 |
| 4 TGA of <b>TriPBI</b> .....                                                 | S5 |
| 5 Optimized structures of <b>TriPBI</b> and <b>PBI</b> monomer.....          | S5 |
| 6 Mass spectrum of <b>TriPBI</b> .....                                       | S6 |
| 7 Copy of NMR spectrum.....                                                  | S6 |

## 1 Material and methods

Building block molecule (**1**)<sup>S1</sup> and **PBI**<sup>S2</sup> were synthesized according by a literature method. All other reactants were purchased from commercial sources. <sup>1</sup>H- and <sup>13</sup>C-NMR in CDCl<sub>3</sub> and 1,2-dichlorobenzene-d<sub>4</sub> was recorded at 400 MHz using Bruker AV-400 and Bruker AV-500 spectrometers with TMS as internal reference. Chemical shifts are reported in parts per million (δ), and the signals have been designated as follows: s (singlet), d (doublet), t (triplet), m (multiplet) and b (broad). Matrix-assisted laser desorption ionization (MALDI) mass spectra were measured on 4800 MALDI TOF/TOF analyzer from Applied Biosystems.

Cyclic voltammetry (CV) and Differential pulse voltammetry (DPV) was performed with a BSA100B/W electrochemical analyzer system in a three electrode single-component cell under argon. The measurements were carried out at 25 °C in an anhydrous and nitrogen-saturated 5 × 10<sup>-4</sup> M solution with ferrocene as internal standard for the calibration of potential. Working electrode: glassy carbon; reference electrode: Ag/AgCl; auxiliary electrode: Pt wire. Samples were measured in 0.05 M solution of Bu<sub>4</sub>NPF<sub>6</sub> in THF with a scan rate of 100 mV/s. The LUMO energy levels were determined from the reduction peak taking into account the SCE level at - 5.08 eV.<sup>S3</sup> Film thicknesses were determined on an Alphastep 500 surface profilometer.

UV-vis spectra of solutions in chlorobenzene with a concentration of 10<sup>-5</sup> mol L<sup>-1</sup> and thin films spincoated on quartz glass were recorded on a HP-8453 UV-Vis spectrophotometer. Fluorescence spectra were measured on a JASCO FP-6500 fluorescence and The fluorescence quantum yields were determined with Rhodamine 6G in ethanol as the reference.<sup>S4</sup> Thermogravimetric analysis (TGA) was performed on TA Instruments TGA Q1000 Series using dynamic scans under nitrogen. DSC measurements were performed on a TA Q1000 under nitrogen with a heating and cooling rate of 10 K min<sup>-1</sup>. The quantum chemical calculations were performed with the Gaussian03 package.<sup>S5</sup>

SCLC devices: SCLC electron-only devices were fabricated using the following structure: glass/ITO/ZnO/Active layer/LiF/Al. Commercial ITO-coated glass substrates with a sheet resistance of 13 Ohms per sq (Lumtec) were cleaned using the following sequence in an ultrasonic bath: water, acetone, and 2-propanol. Each ITO substrate was patterned using photolithography techniques. After ozone treatment of the substrates for 5 min, ZnO (25nm) was spin-coated onto the ITO surface and dried at 120 °C for 30 min. After cooling the substrate, the active layer was spin-coated from chloroform solutions. The substrates were then put in a thermal evaporation chamber to evaporate the top electrode (1.5 nm LiF/100 nm Al) under high vacuum (1 × 10<sup>-6</sup> mbar) through a shadow mask (active area 12 mm<sup>2</sup>). The current–voltage characteristics of the devices were measured using a Keithley 2400 (I-V) Digital SourceMeter at 25 °C.

The active area amounts to 1.2 × 10<sup>-5</sup> m<sup>2</sup>. I – V characteristics of the devices were recorded at up to 10 V at room temperature in air. At high voltages the current is space-charge-limited only, assuming ohmic contacts to the injecting electrode. It should be noted that for current densities larger than 0.1 A cm<sup>-2</sup>, the applied voltage should be adjust for voltage drop from the indium tin oxide (ITO) series resistance V<sub>Rs</sub>, which typically amounts to 30–35 Ω in our substrates.

References:

S1 Zhao, Z.; Zhang, Y.; Xiao, Y. *J. Org. Chem.* **2013**, *78*, 5544.

S2 Wicklein, A.; Lang, A.; Muth, M.; Thelakkat, M. *J. Am. Chem. Soc.* **2009**, *131*, 14442.

S3 Thompson, B. C.; Kim, Y. G.; McCarley, T. D. *J. Am. Chem. Soc.* **2006**, *128*, 12714.

S4 M. Fischer and J. Georges, *Chem. Phys. Lett.* 1996, **260**, 115.

S5 M.J. Frisch, G.W. Trucks, H.B. Schlegel, G.E. Scuseria, M.A. Robb, J.R. Cheeseman, J.A. Montgomery, T. Jr. Vreven, K.N. Kudin, J.C. Burant, J.M. Millam, S.S. Iyengar, J. Tomasi, V. Barone, B. Mennucci, M. Cossi, G. Scalmani, N. Rega, G.A. Petersson, H. Nakatsuji, M. Hada, M. Ehara, K. Toyota, R. Fukuda, J. Hasegawa, M. Ishida, T. Nakajima, Y. Honda, O. Kitao, H. Nakai, M. Klene, X. Li, J.E. Knox, H.P. Hratchian, J.B. Cross, V. Bakken, C. Adamo, J. Jaramillo, R. Gomperts, R.E. Stratmann, O. Yazyev, A.J. Austin, R. Cammi, C. Pomelli, J. W. Ochterski, P. Y. Ayala, K. Morokuma, G. A. Voth, P. Salvador, J. J. Dannenberg, V.G. Zakrzewski, S. Dapprich, A.D. Daniels, M.C. Strain, O. Farkas, D. K. Malick, A. D. Rabuck, K. Raghavachari, J.B. Foresman, J.V. Ortiz, Q. Cui, A.G. Baboul, S. Clifford, J. Cioslowski, B.B. Stefanov, G. Liu, A. Liashenko, P. Piskorz, I. Komaromi, R. L. Martin, D. J. Fox, T. Keith, M. A. Al-Laham, C.Y. Peng, A. Nanayakkara, M. Challacombe, P.M.W. Gill, B. Johnson, W. Chen, M. W. Wong, C. Gonzalez, J.A. Pople. Gaussian 03, revision E.01; Gaussian, Inc.: Wallingford CT, 2004.

## 2 Synthesis of target compound

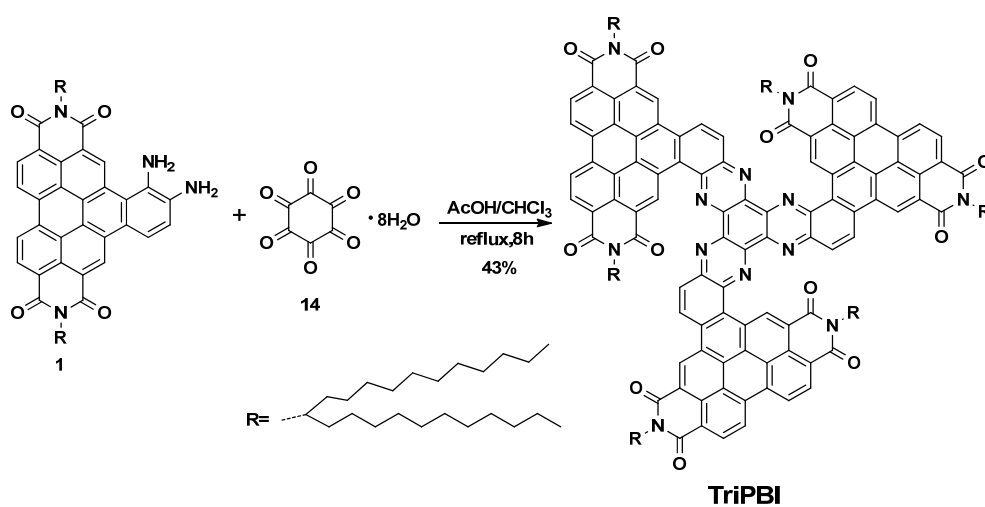

### Synthesis of compound TriPBI.

A mixture of Compound **1** (340 mg, 0.297 mmol), Compound **14** (18.5 mg, 0.059 mmol), 10 mL CHCl<sub>3</sub>, 30 mL AcOH were stirred reflux for 8 h. Then, the crude product was purified through silica gel column chromatography with mixture of CH<sub>2</sub>Cl<sub>2</sub> and hexane 1:1 as eluent. **TriPBI** was obtained as dark red solid (89 mg, 43%). MALDI-TOF-MS: Calcd for C<sub>234</sub>H<sub>306</sub>N<sub>12</sub>O<sub>12</sub> 3476.3703, found: 3476.4043. <sup>1</sup>H NMR (400 MHz, CDCl<sub>3</sub>) δ 12.65 (s, 1H), 10.72 (s, 1H), 10.24 (s, 1H), 9.96 (s, 1H), 9.44 (s, 1H), 9.27 (s, 1H), 8.52 (s, 1H), 8.04 (s, 1H), 5.54 (m, 2H), 3.65 – 2.63 (m, 4H), 2.34 (d, *J* = 85.2 Hz, 8H), 1.85 – 1.22 (m, 48H), 0.70 (d, m, 32H).; <sup>13</sup>C NMR (10 MHz, CDCl<sub>3</sub>) δ 165.63, 164.58, 164.21, 163.90, 163.84, 163.12, 145.58, 145.43, 142.08, 140.88, 133.61, 133.08, 131.77, 130.71, 128.52, 128.33, 128.12, 127.19, 126.46, 125.67, 125.47, 124.86, 123.24, 123.01, 122.52, 56.09, 55.76, 32.11, 31.86, 30.24, 29.70, 29.55, 27.61, 22.86, 22.58, 14.26, 14.01.

### 3 Differential pulse voltammetry (DPV) of TriPBI and PBI

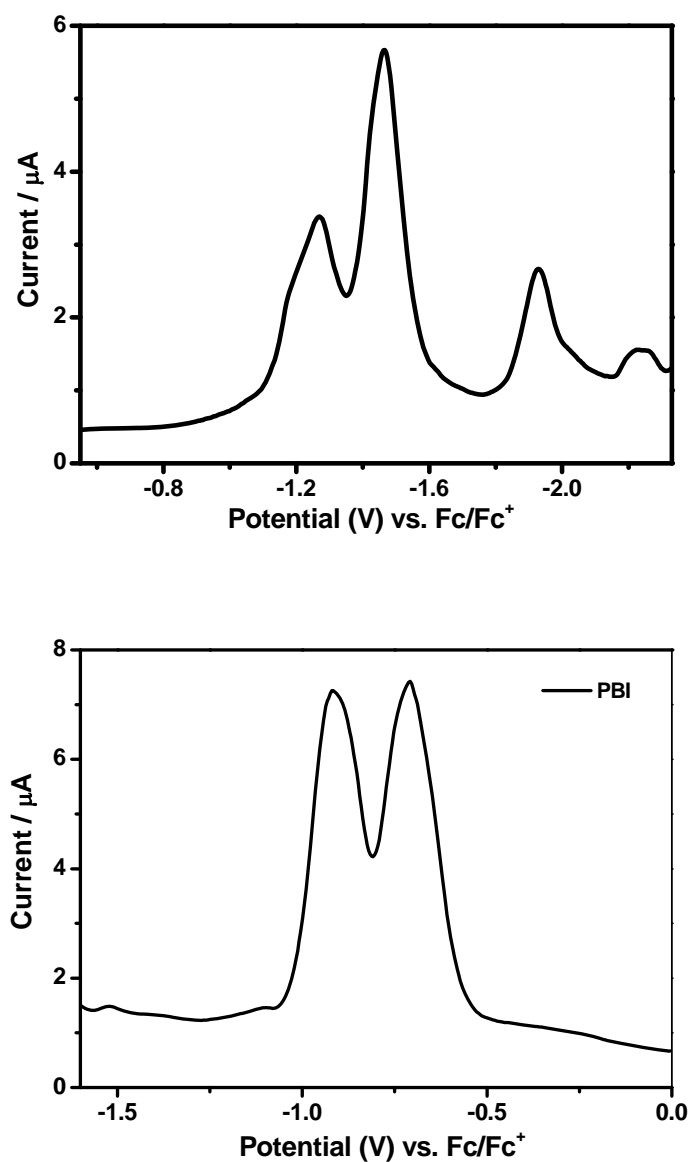

**Fig. S1** Differential pulse voltammogram (DPV) of **TriPBI** and **PBI** in dichloromethane -TBAPF<sub>6</sub> (0.1 M), scan speed 10 mV/s.

#### 4 TGA of TriPBI

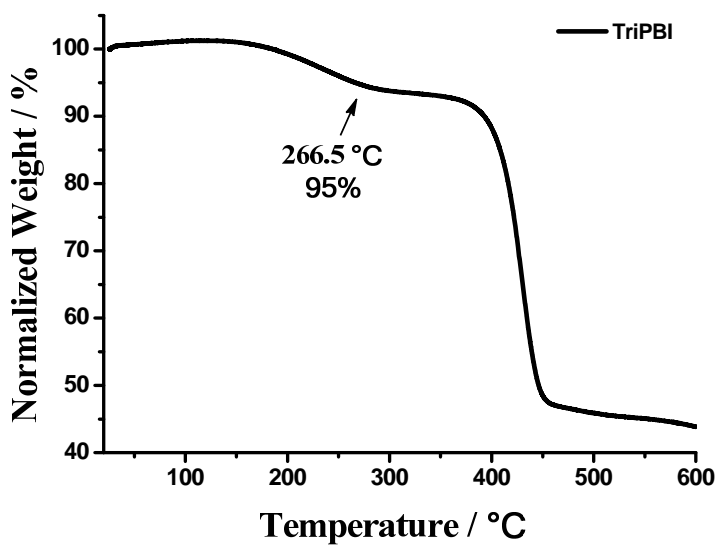

Fig. S2 TGA curves of compounds **TriPBI**

#### 5 Optimized structures of TriPBI and PBI monomer

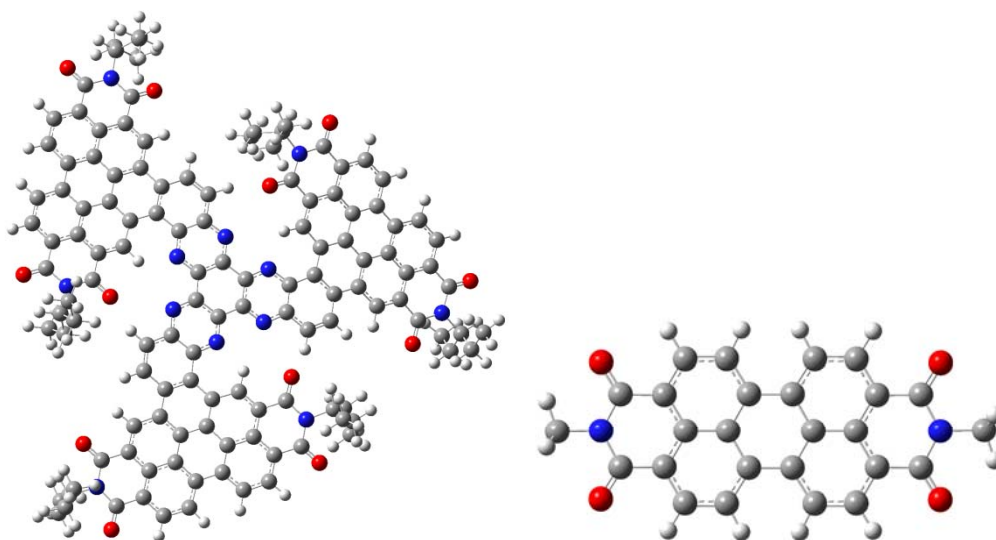

Fig. S3 Optimized structures of **TriPBI** (left) and **PBI** monomer (right)

To well explain different optical properties between **TriPBI** and **PBI** monomer, aromatic core structures of **TriPBI** and **PBI** monomer were calculated by the Gaussian 03 program, DFT-B3LYP/6-31G method. The dihedral angle between HAT core and PBI “arms” is 8.52°.

## 6 Mass spectrum of TriPBI

ZZB(S)

12052415 8 (0.264) Cn (Cen,4, 50.00, Ht); Sm (SG, 2x3.00); Sb (15,10.00); Cm (8) TOF LD-322

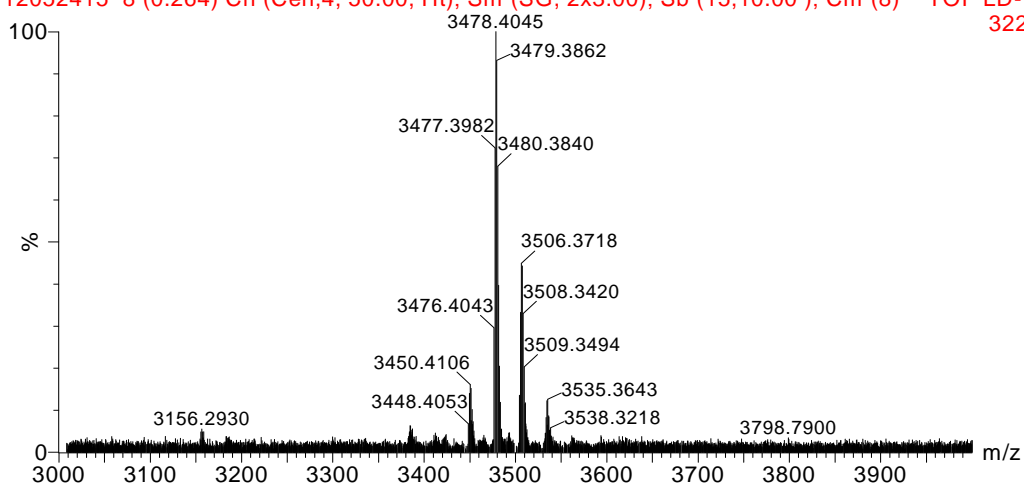

## 7 Copy of NMR spectrum

$^1\text{H}$  and  $^{13}\text{C}$  NMR spectrum of TriPBI

$^1\text{H}$  NMR (400 MHz) spectrum of TriPBI in  $\text{CDCl}_3$  and its enlarged low-field section (inserted figure)

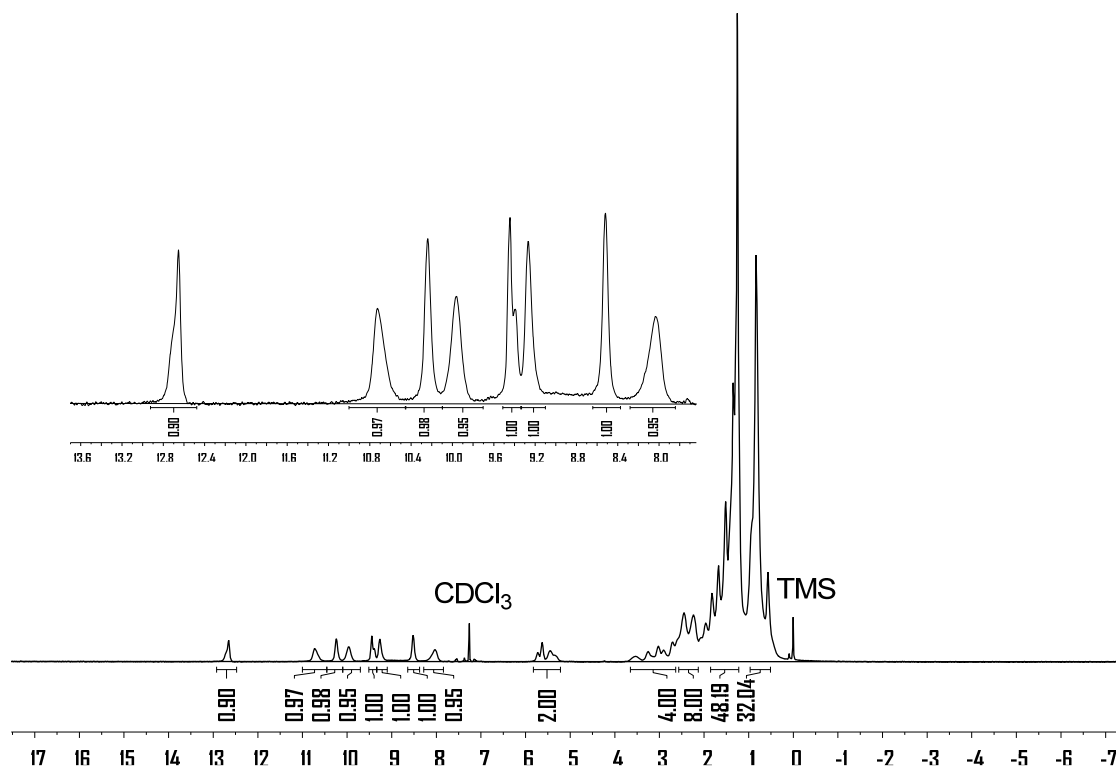

$^{13}\text{C}$  NMR (100 MHz) spectrum of TriPBI in  $\text{CDCl}_3$  and its enlarged low-field section (inserted figure)

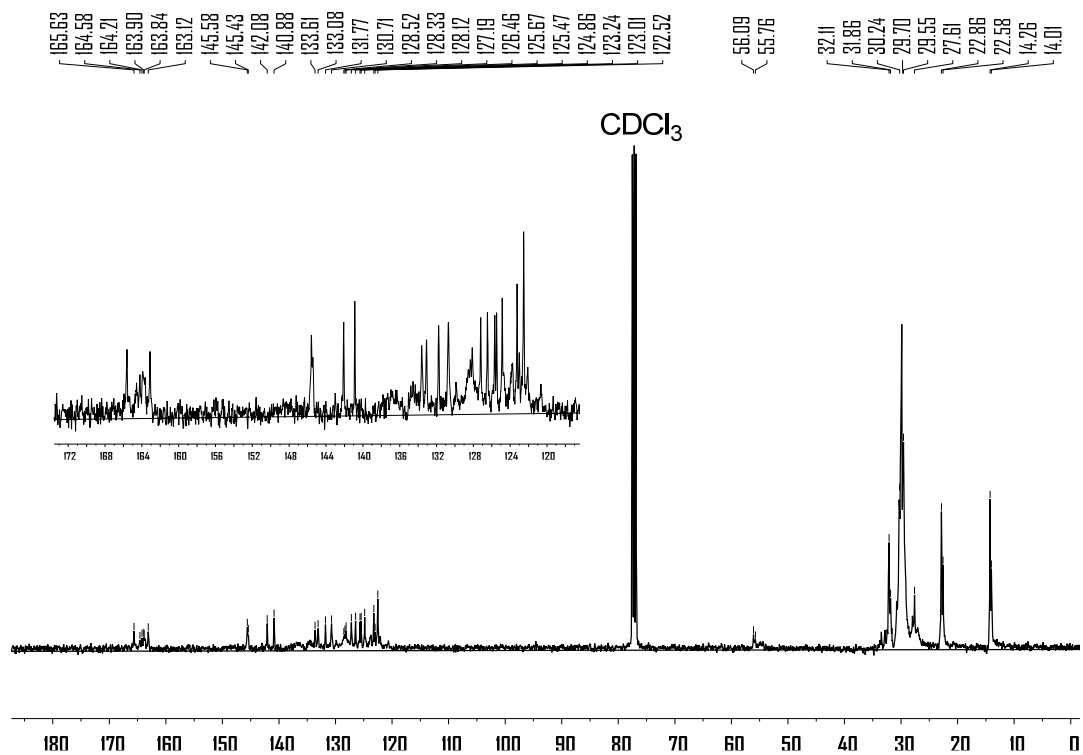

Supplement: c3ra44553d.pdf [file c3ra44553d.pdf]
